# Supplementary material
Source: HighWire-hosted journal article supplement (https://www.cmajopen.ca/highwire/filestream/81373/field_highwire_adjunct_files/0/2019-0164-1-at.pdf)
Supplement: 2019-0164-1-at.pdf [file 2019-0164-1-at.pdf]

**Appendix 1 (as supplied by the authors): Cohort assembly diagrams for patients living with diabetes as of September 30, 2015.**

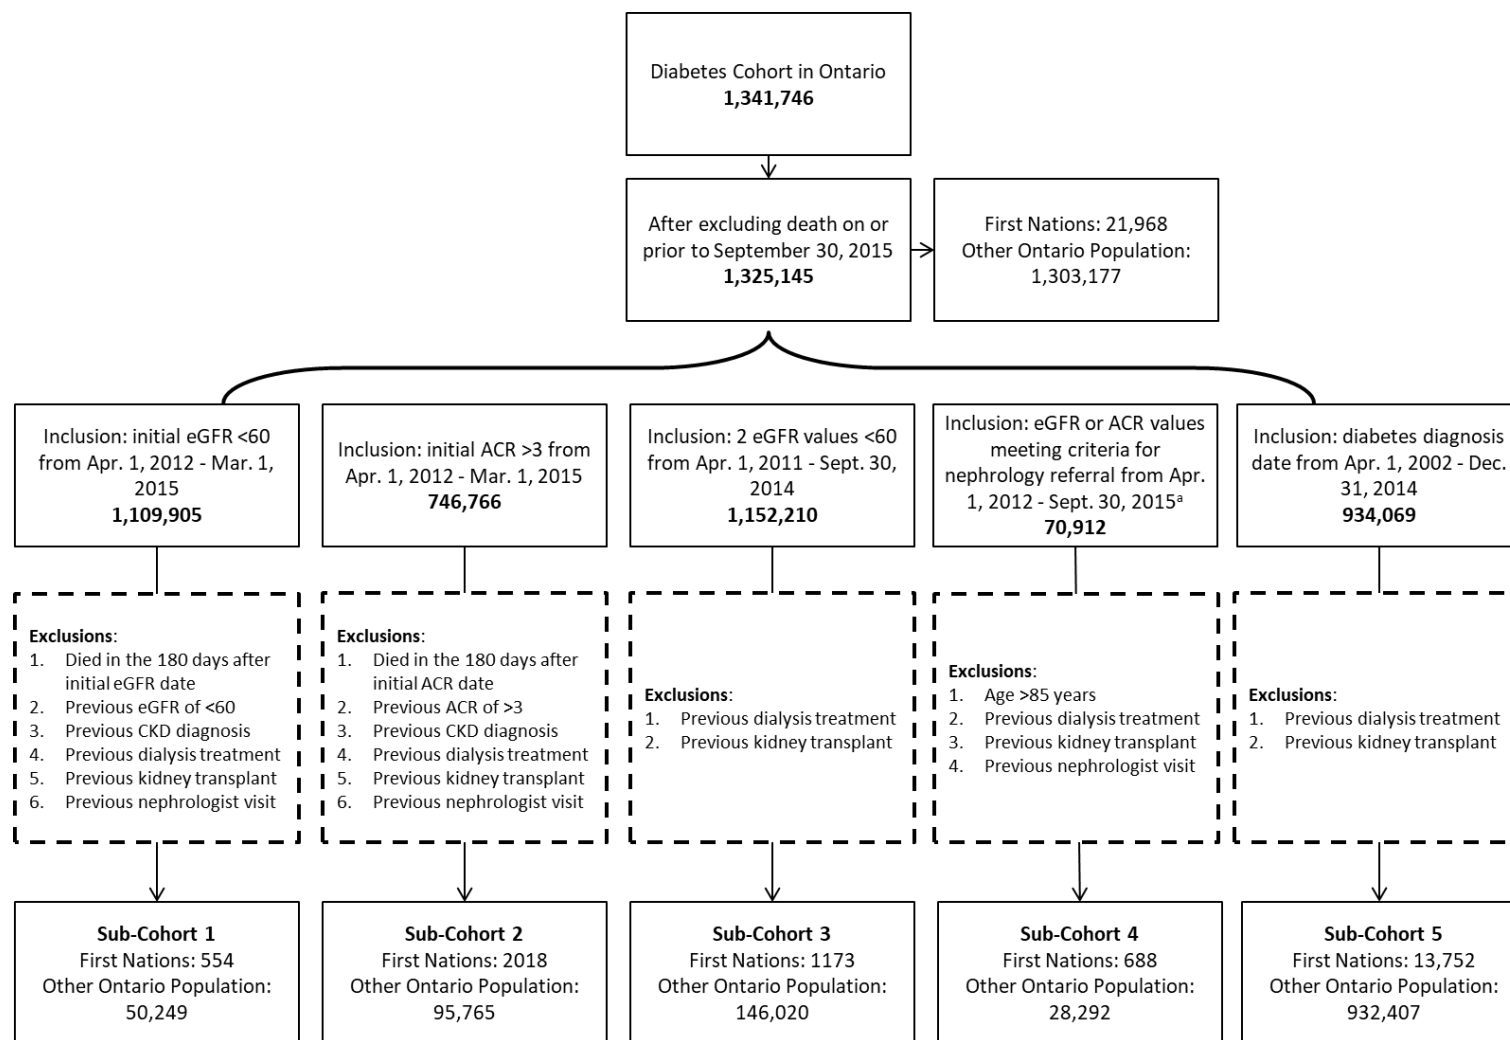

Abbreviations: ACR, albumin-to-creatinine ratio; eGFR, estimated glomerular filtration rate; CKD, chronic kidney disease.

<sup>a</sup> Criteria for nephrology referral included: eGFR <30, ACR >60, eGFR <45 and ACR >30-60, or eGFR <60 and  $\geq 5$  mL decline in the following 6 months.(16,18)

Note: ACR units are mg/mmol; eGFR units are mL/min/1.73 m<sup>2</sup>.

#### References

16. Tu K, Bevan L, Hunter K, et al. Quality indicators for the detection and management of chronic kidney disease in primary care in Canada derived from a modified Delphi panel approach. *CMAJ Open* 2017;5:E74-81.
18. Fay MP, Feuer EJ. Confidence intervals for directly standardized rates: a method based on the gamma distribution. *Stat Med* 1997;16:791-801.
